# Supplementary material for: Stratospheric lifetime ratio of CFC-11 and CFC-12 from satellite and model climatologies
Source: Copernicus journal article supplement (doi:10.5194/acp-14-12479-2014), 2014-11-27
Supplement: Supplementary file 1 [file acp-14-12479-2014-supplement.zip]

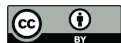

## *Supplement of*

# **Stratospheric lifetime ratio of CFC-11 and CFC-12 from satellite and model climatologies**

**L. Hoffmann et al.**

*Correspondence to:* L. Hoffmann (l.hoffmann@fz-juelich.de)

- [acp-14-12479-2014-supplement-cover-letter.pdf](#)
- README
- ace
  - clim.tab
- clams
  - clim.tab
- hirdls
  - clim.tab
- mipas
  - clim.tab
- scr
  - lifetime.sh
